# Supplementary material
Source: publisher figshare collection journal article supplement (https://gsajournals.figshare.com/ndownloader/files/22367340)
Supplement: Supplementary file 1 [file 22367340]

## Sheet: Sheet1
Strain	Genotype	Method
HCL117	gfp::prg-1 glh-4(uoc10) I	CRISPR/Cas9
HCL118	glh-1(uoc1) I	CRISPR/Cas9
HCL119	glh-1DAAD(uoc2) I	CRISPR/Cas9
HCL120	glh-1DQAD(uoc3) I	CRISPR/Cas9
HCL121	glh-1FGG∆(uoc4) I	CRISPR/Cas9
HCL122	glh-1(uoc5) glh-4(gk225) I/hT2 [bli-4(e937) let-?(q782) qIs48] (I;III)	CRISPR/Cas9
HCL123	gfp::prg-1 glh-1(uoc1) I	Cross
HCL124	gfp::prg-1 glh-1(uoc1) glh-4(uoc6) I	CRISPR/Cas9
HCL125	gfp::prg-1 flag::mCherry::glh-1 I	CRISPR/Cas9
HCL126	gfp::prg-1 flag::mCherry::glh-1DAAD I	CRISPR/Cas9
HCL127	gfp::prg-1 flag::mCherry::glh-1DQAD I	CRISPR/Cas9
HCL128	gfp::prg-1 flag::mCherry::glh-1FGG∆ I	CRISPR/Cas9
HCL129	gfp::csr-1 IV; glh-1(uoc1) I	Cross
HCL130	gfp::csr-1 IV; glh-1DQAD(uoc3) I	Cross
HCL131	gfp::csr-1 IV; glh-1(uoc5) glh-4(gk225)	Cross
HCL132	gfp::pgl-1 IV; glh-1DQAD(uoc3) I	Cross
HCL133	gfp::pgl-1 IV; glh-1(uoc5) glh-4(gk225) I	Cross
HCL143	gfp::prg-1 flag::mCherry::glh-1(T663A) I	CRISPR/Cas9
HCL145	gfp::prg-1 flag::mCherry::glh-1(Q368A) I	CRISPR/Cas9
HCL150	gfp::prg-1 flag::mCherry::glh-1FGG∆ glh-4(uoc11) I	CRISPR/Cas9
